# Supplementary material for: Computational prediction and experimental validation of Salmonella Typhimurium SopE-mediated fine-tuning of autophagy in intestinal epithelial cells
Source: Front Cell Infect Microbiol. 2022 Aug 17;12:834895. doi: 10.3389/fcimb.2022.834895 (PMC9428466; doi:10.3389/fcimb.2022.834895)
Supplement: Supplementary file 1 [file Table_1.xlsx]

## Sheet: Sheet1
Salmonella_effector_UniProt	Salmonella_effector_GeneSymbol	First_neighbour_of_transcription_factor_UniProt	First_neighbour_of_transcription_factor_GeneSymbol	Transcription_factor_UniProt	Transcription_factor_GeneSymbol	Autophagy_protein		P0DPQ6	DDIT3*	DDIT3 upstream open reading frame protein
O52623	SopE	P11142	HSPA8	P04637	TP53	LC3		P35638	DDIT3**	DNA damage-inducible transcript 3 protein
O52623	SopE	P29590	PML	P04637	TP53	LC3
O52623	SopE	P07900	HSP90AA1	P04637	TP53	LC3
O52623	SopE	P19525	EIF2AK2	P04637	TP53	LC3
O52623	SopE	P30307	CDC25C	P04637	TP53	LC3
O52623	SopE	P05787	KRT8	P04637	TP53	LC3
O52623	SopE	Q05086	UBE3A	P04637	TP53	LC3
O52623	SopE	Q07817	BCL2L1	P04637	TP53	LC3
O52623	SopE	Q13464	ROCK1	P04637	TP53	LC3
O52623	SopE	-		P04637	TP53	LC3
O52623	SopE	P29466	CASP1	P04637	TP53	LC3
O52623	SopE	Q66K89	E4F1	P04637	TP53	LC3
O52623	SopE	P01112	HRAS	P04637	TP53	LC3
O52623	SopE	P63104	YWHAZ	P04637	TP53	LC3
O52623	SopE	P63279	UBE2I	P04637	TP53	LC3
O52623	SopE	P61981	YWHAG	P04637	TP53	LC3
O52623	SopE	P23443	RPS6KB1	P04637	TP53	LC3
O52623	SopE	O15304	SIVA1	P04637	TP53	LC3
O52623	SopE	P08238	HSP90AB1	P04637	TP53	LC3
O52623	SopE	-		P08047	SP1	LC3
O52623	SopE	Q05513	PRKCZ	P08047	SP1	LC3
O52623	SopE	P10415	BCL2	P0DPQ6;P35638;P04637	DDIT3*;DDIT3**,TP53	LC3
O52623	SopE	Q16539	MAPK14	P0DPQ6;P35638;Q01094;P04637	DDIT3*;DDIT3**,E2F1,TP53	LC3
O52623	SopE	P28482	MAPK1	P0DPQ6;P35638;Q01094;P08047;P04637	DDIT3*;DDIT3**,E2F1,SP1,TP53	LC3
O52623	SopE	Q13485	SMAD4	P18846	ATF1	LC3
O52623	SopE	P17612	PRKACA	P18846;Q01094	ATF1;E2F1	LC3
O52623	SopE	P35637	FUS	P18848	ATF4	LC3
O52623	SopE	P04637	TP53	Q01094	E2F1	LC3
O52623	SopE	P20226	TBP	Q01094	E2F1	LC3
O52623	SopE	P42574	CASP3	Q01094	E2F1	LC3
O52623	SopE	P17252	PRKCA	Q01094;P04637	E2F1;TP53	LC3
O52623	SopE	P38398	BRCA1	Q01094;P04637	E2F1;TP53	LC3
O52623	SopE	Q04206	RELA	Q01094;P04637;P08047	E2F1;TP53;SP1	LC3
O52623	SopE	P27361	MAPK3	Q01094;P08047;P04637	E2F1;SP1;TP53	LC3
